# Supplementary material for: Ranking Regions, Edges and Classifying Tasks in Functional Brain Graphs by Sub-Graph Entropy
Source: PubMed Central journal article supplement (PMC6527859; doi:10.1038/s41598-019-44103-8), 2019-05-20
Supplement: 41598_2019_44103_MOESM1_ESM.pdf [file 41598_2019_44103_MOESM1_ESM.pdf]

# Ranking Regions, Edges and Classifying Tasks in Functional Brain Graphs by Sub-Graph Entropy

Bhaskar Sen<sup>1</sup>, Shu Hsien Chu<sup>1</sup> and Keshab K. Parhi<sup>1,\*</sup>

<sup>1</sup>Electrical and Computer Engineering, University of Minnesota, Minneapolis

\*parhi@umn.edu

## Supplementary Information

The Supplementary Information contains twelve Subsections. Subsection S.1 provides pipeline for the ranking process. Subsection S.2 illustrates the important regions and edges for different task conditions. Subsection S.3 illustrates the ROC curves for classification performance. Subsection S.4 lists edges based on differential edge entropy and lists ranked regions by state-of-the-art centrality measures. Subsection S.5 shows the histograms of occurrences for regions and edges. Subsection S.6 shows distribution of accuracy values during a permutation test. Subsection S.7 compares graph entropy with structural centrality. Subsection S.8 contains images containing comparison of graph entropy and sub-graph (intersection and union of top regions and edges) entropies between two groups. Subsection S.9 describes the details about the atlas used in this paper. Subsection S.10 shows that maximizing *sub-graph* entropy is equivalent to maximizing mutual information. Subsection S.11 contains a theoretical justification for using sample average entropy as proxy for group entropy. Subsection S.12 provides a justification of using absolute correlation as edge weights.

### S.1: Pipeline for Ranking of Regions and Edges

This subsection illustrates the pipeline for ranking procedure of nodes and edges.

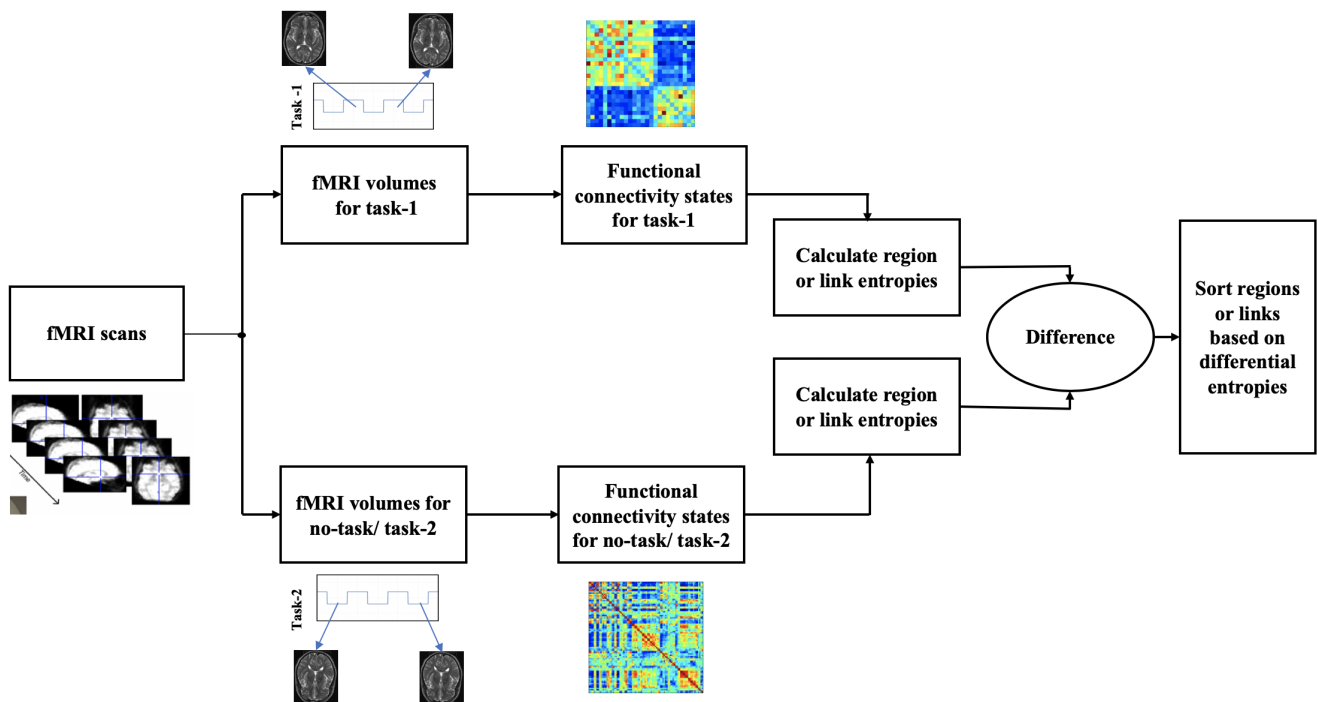

**Figure S1.** Pipeline for ranking of regions and edges. After parcellating fMRI scans into regions, *sub-graph* entropies (region and edge entropies) are calculated for each subject's functional network. These differential entropies are then used for ranking the regions and edges.

## S.2: Important Regions and Edges

This subsection demonstrates the important nodes and edges for different *states*.

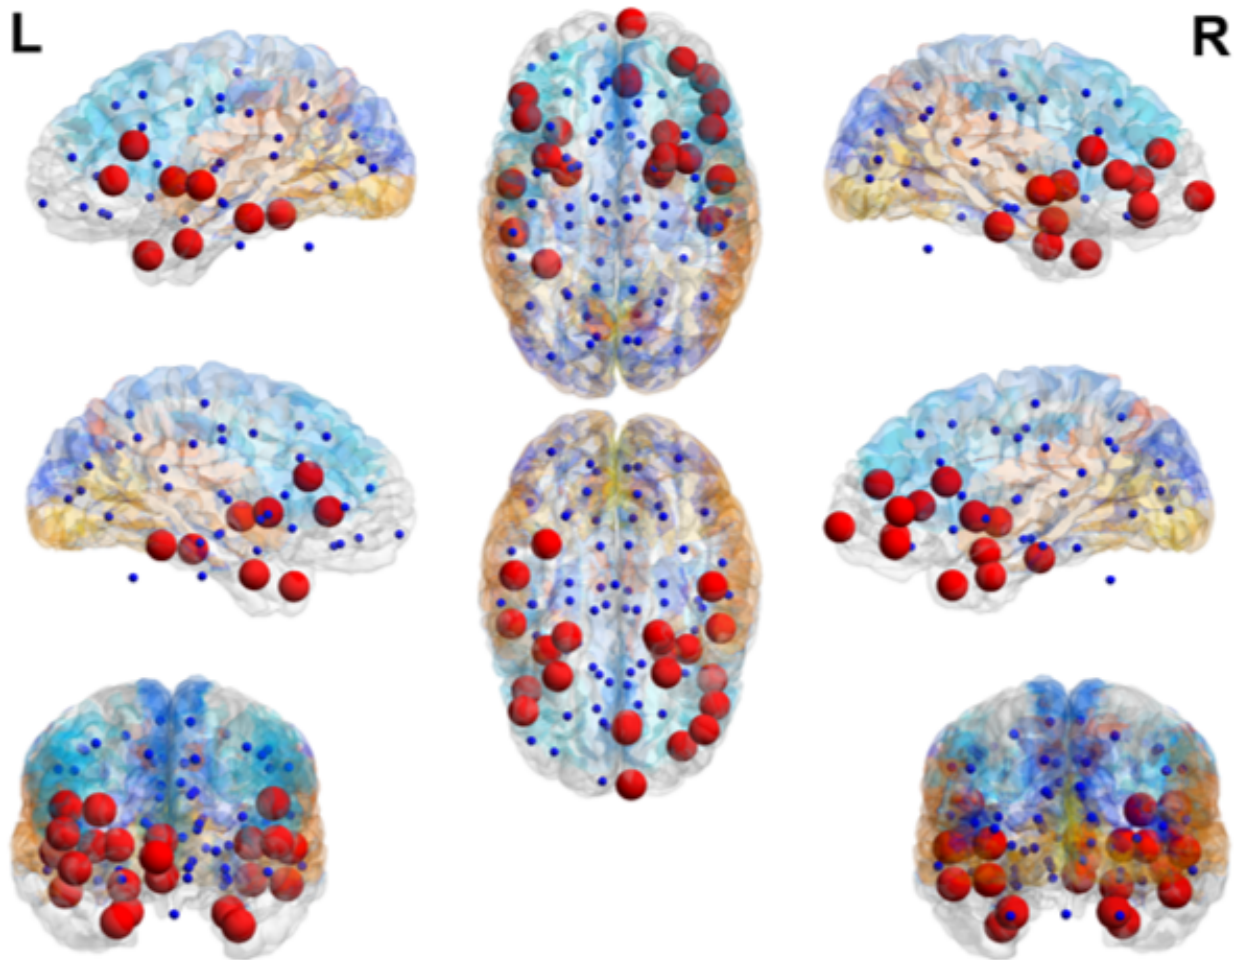

**Figure S2.** Visualization of important regions within brain. These regions carry the highest entropies within the functional network related to a *task* representing emotion task. The regional importance is shown by the size of spheres. Top-25 regions are shown in *red*. All regions are at least 2-standard deviations away from mean entropy.

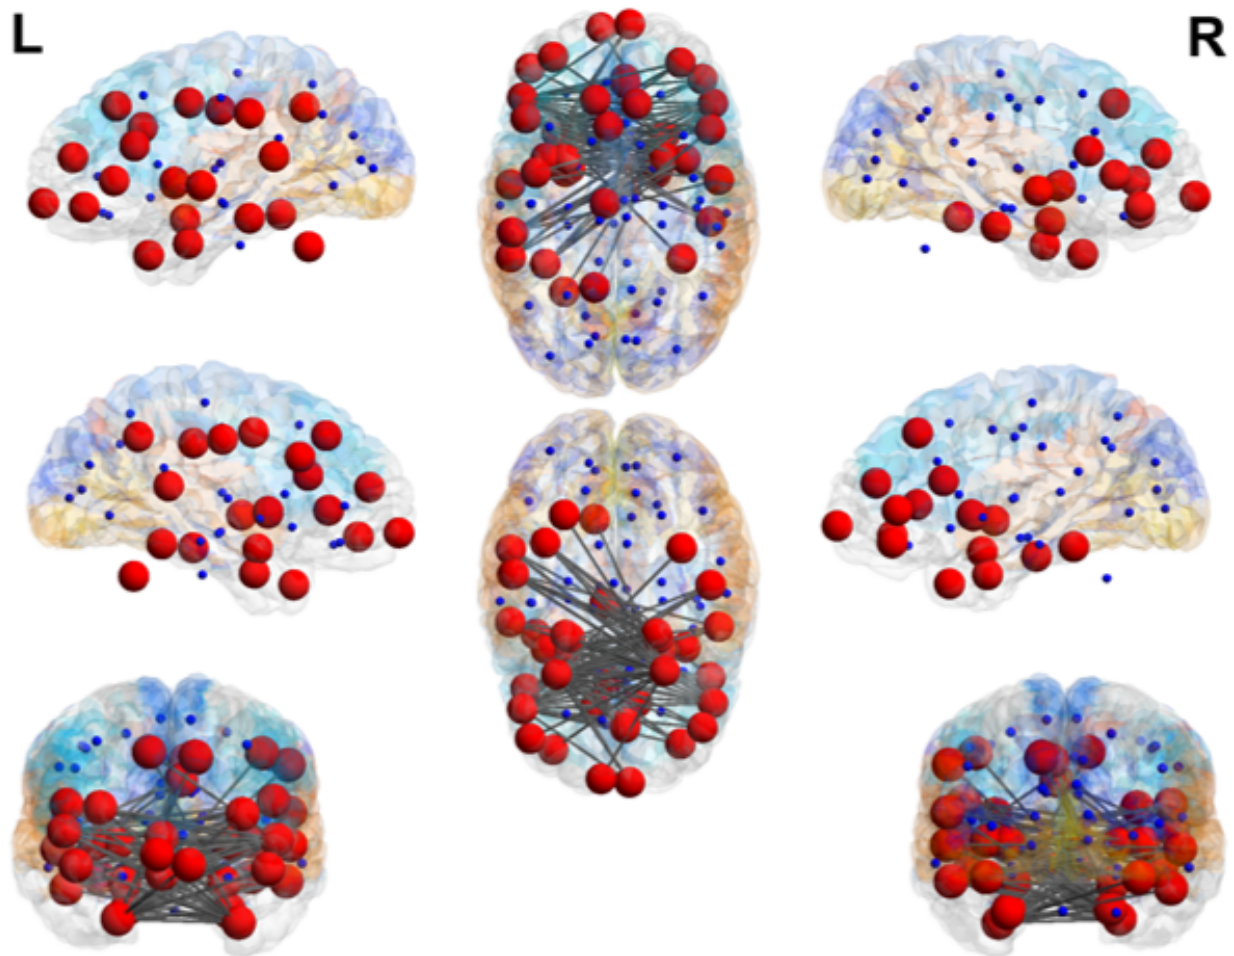

**Figure S3.** Visualization of important edges within brain for emotion task. These edges carry the highest entropies within the functional network related to a *task*. The regional importance is shown by the size of spheres. Top-25 regions that are at least 2-standard deviations away from mean entropy are shown in *red*.

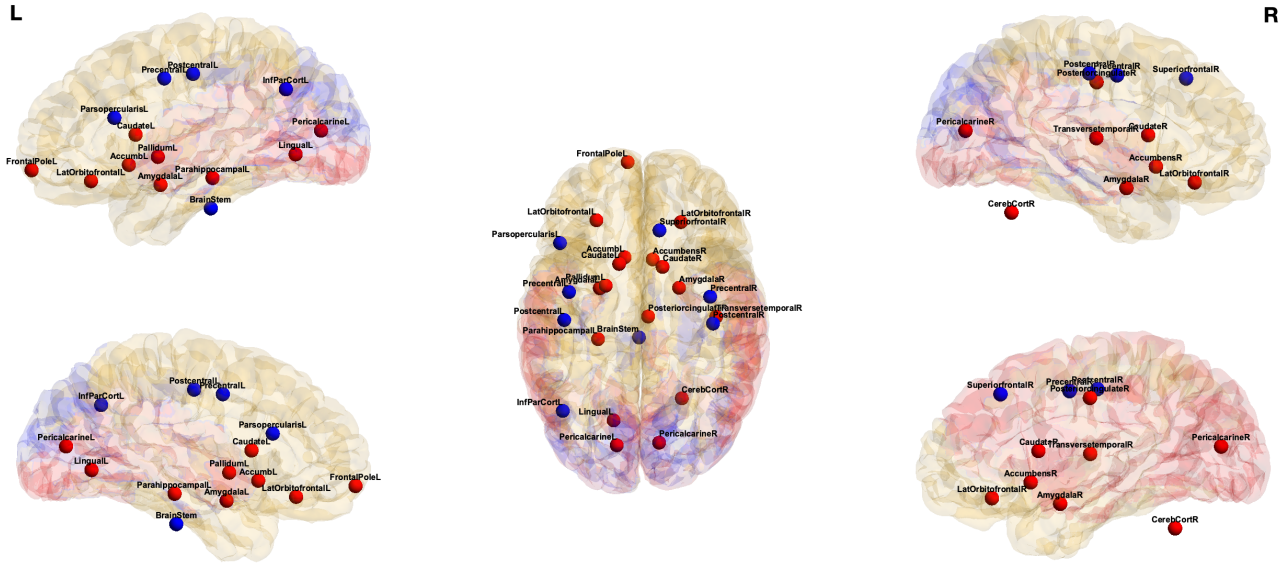

**Figure S4.** Visualization of *important* regions that have highest differential entropy between two *states* for gambling task vs. no-task. *Red*: regions that have higher node entropy during gambling task, *blue*: regions that have higher node entropy during no-task.

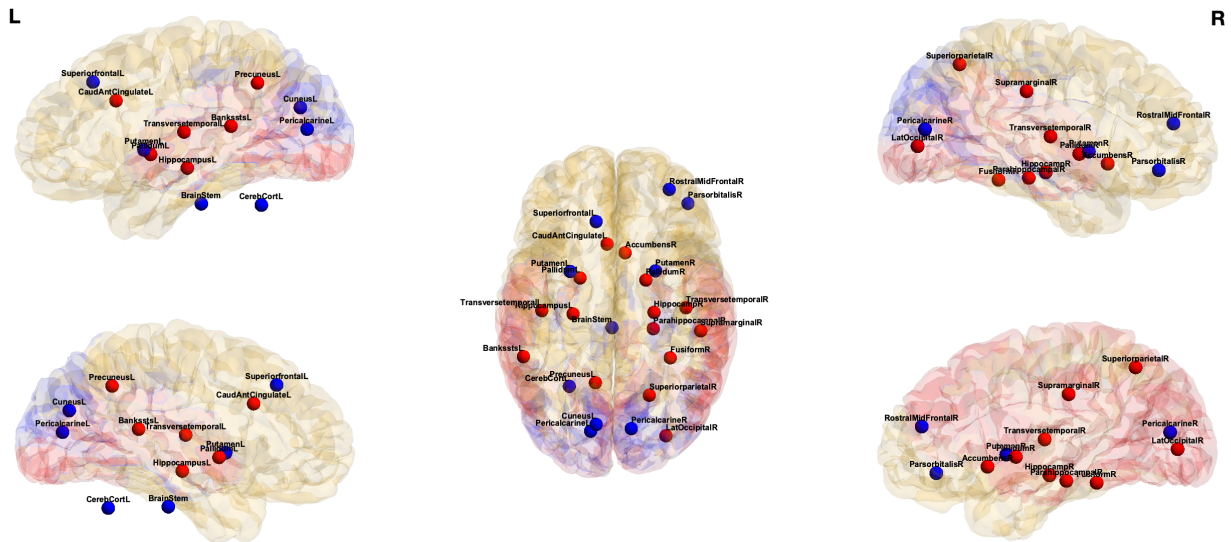

**Figure S5.** Visualization of *important* regions that have highest differential entropy between two *states* for emotion vs. gambling task. *Red*: regions that have higher node entropy during emotion task, *blue*: regions that have higher node entropy during gambling task.

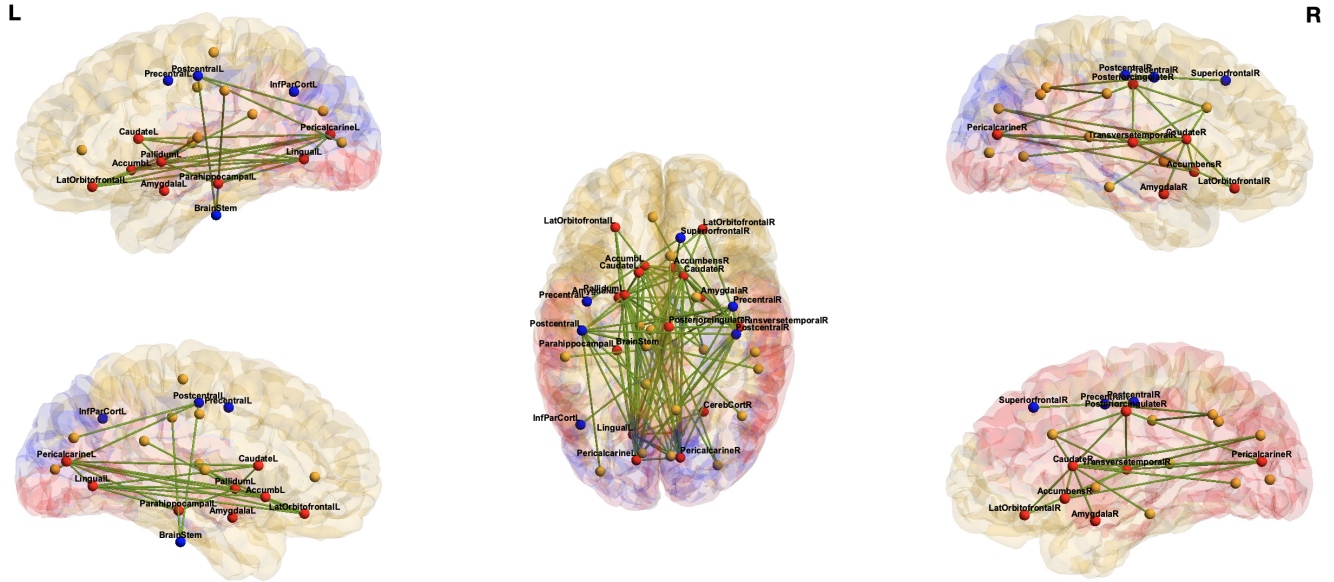

**Figure S6.** Visualization of *important* edges that have highest differential entropy between two *states* for gambling task vs. no-task. *Red*: regions that have higher node entropy during gambling task, *blue*: regions that have higher node entropy during no-task, *yellow*: regions that are not significant based on only node entropy.

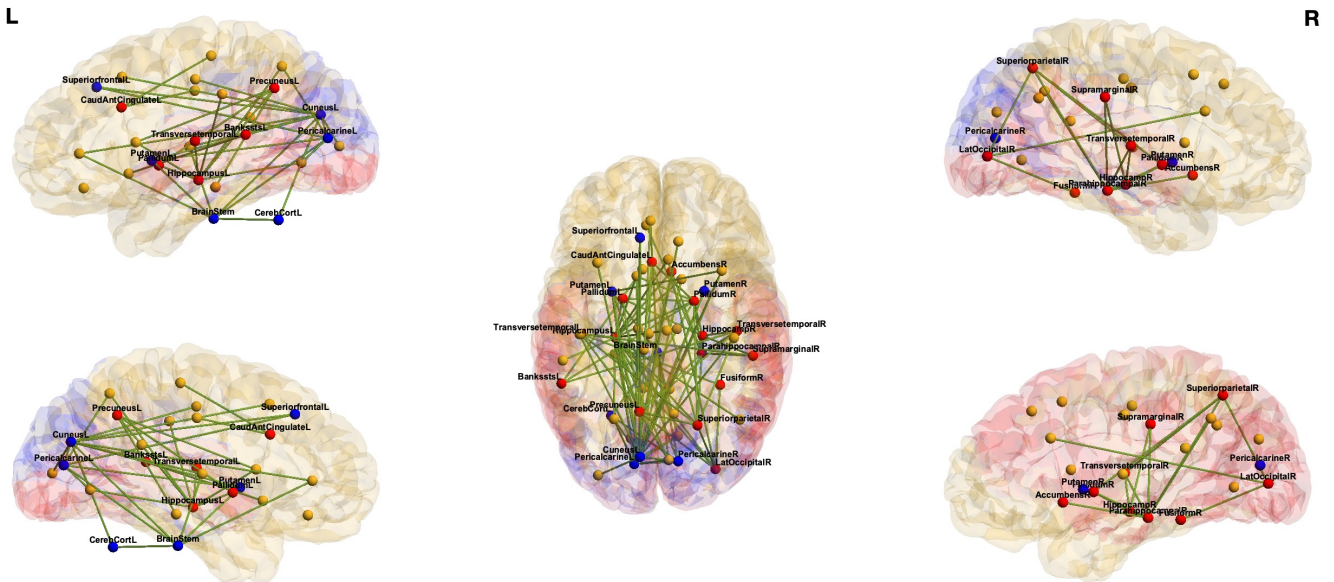

**Figure S7.** Visualization of *important* edges that have highest differential entropy between two *states* for emotion vs. gambling task. *Red*: regions that have higher node entropy during emotion task, *blue*: regions that have higher node entropy during gambling, *yellow*: regions that are not significant based on only node entropy.

### S.3: ROC curve for classification

This subsection compares the Receiver Operating Characteristic (ROC) curves for different classification tasks.

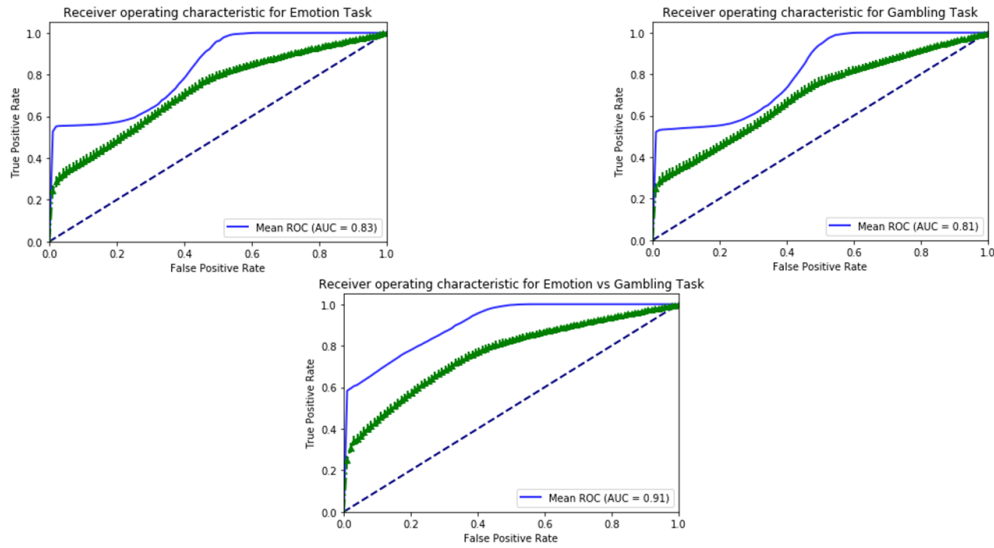

**Figure S8.** ROC curve for region based centrality. *blue*: ROC curve using sub - graph entropy, *green*: mean ROC curve using 4-centrality measures: *degree*, *eigenvector*, *betweenness*, *leverage*, *blue broken*: random guessing using ROC baseline.

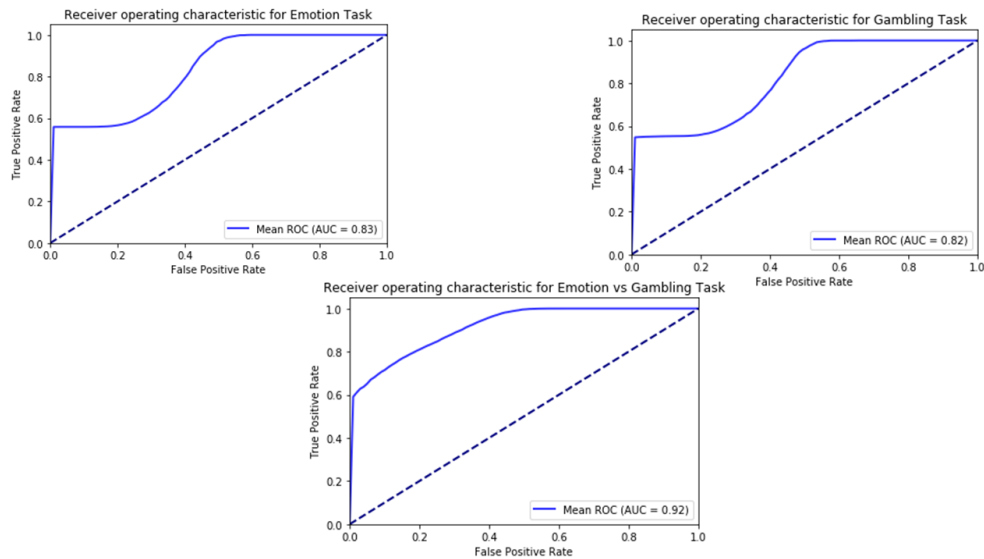

**Figure S9.** ROC curve for edge based centrality: *blue*: ROC curve using *sub-graph* entropy, *blue broken*: ROC baseline using random guessing.

### S.4: Edge Ranking Based on Differential Entropy

This subsection lists the edges ranked according to their differential entropy.

**Table S1.** Edge ranking

| Emotion vs. No-task              |                           | Entropy | Gambling vs. No-task        |                           | Entropy |
|----------------------------------|---------------------------|---------|-----------------------------|---------------------------|---------|
| Edges                            |                           |         | Edges                       |                           |         |
| ctx_lh_pericalcarine             | ctx_rh_pericalcarine      | 0.1917  | Left_Pallidum               | Right_Caudate             | 0.1834  |
| ctx_lh_pericalcarine             | ctx_lh_superiorparietal   | 0.1884  | ctx_lh_lingual              | ctx_lh_pericalcarine      | 0.1816  |
| ctx_lh_superiorparietal          | ctx_rh_superiorparietal   | 0.1838  | ctx_rh_lateralorbitofrontal | ctx_rh_transversetemporal | 0.1758  |
| ctx_lh_superiorparietal          | ctx_rh_pericalcarine      | 0.1843  | Left_Accumbens_area         | ctx_rh_transversetemporal | 0.1647  |
| ctx_lh_pericalcarine             | ctx_rh_superiorparietal   | 0.1778  | Left_Caudate                | ctx_lh_pericalcarine      | 0.1641  |
| Right_Pallidum                   | ctx_lh_isthmuscingulate   | 0.1997  | Left_Accumbens_area         | ctx_rh parahippocampal    | 0.1613  |
| ctx_rh_pericalcarine             | ctx_rh_superiorparietal   | 0.1495  | Left_Pallidum               | ctx_lh_pericalcarine      | 0.1605  |
| Right_Thalamus_Proper            | ctx_lh_superiorparietal   | 0.1431  | Left_Caudate                | Left_Pallidum             | 0.1562  |
| ctx_lh_pericalcarine             | ctx_rh_lingual            | 0.1406  | ctx_lh_pericalcarine        | ctx_rh_transversetemporal | 0.15422 |
| ctx_lh_superiorparietal          | ctx_rh_lingual            | 0.1404  | ctx_lh_postcentral          | ctx_rh_precuneus          | 0.1515  |
| ctx_lh_pericalcarine             | ctx_rh_cuneus             | 0.1384  | Left_Pallidum               | ctx_lh_lingual            | 0.1487  |
| Left_Accumbens_area              | Right_Pallidum            | 0.1382  | Left_Caudate                | Right_Caudate             | 0.1484  |
| Right_Caudate                    | Right_Pallidum            | 0.1335  | Right_Caudate               | ctx_rh parahippocampal    | 0.1468  |
| ctx_lh_rostralantteriorcingulate | ctx_lh_superiorparietal   | 0.1312  | Left_Accumbens_area         | ctx_lh_pericalcarine      | 0.1463  |
| ctx_lh parahippocampal           | ctx_rh_transversetemporal | 0.1303  | Left_Accumbens_area         | Right_Accumbens_area      | 0.1443  |
| ctx_lh_isthmuscingulate          | ctx_rh_transversetemporal | 0.1293  | Left_Accumbens_area         | Right_Caudate             | 0.1436  |
| Right_Caudate                    | ctx_rh_transversetemporal | 0.1285  | Left_Pallidum               | Left_Accumbens_area       | 0.1424  |
| Right_Caudate                    | ctx_rh parahippocampal    | 0.1273  | Left_Pallidum               | ctx_rh_cuneus             | 0.1398  |
| Left_Hippocampus                 | Right_Pallidum            | 0.1268  | Left_Pallidum               | ctx_rh_transversetemporal | 0.1392  |
| Left_Hippocampus                 | ctx_rh_transversetemporal | 0.1247  | Right_Pallidum              | ctx_lh_lingual            | 0.1391  |
| ctx_rh_lingual                   | ctx_rh_pericalcarine      | 0.1240  | Left_Pallidum               | ctx_lh parahippocampal    | 0.1390  |
| ctx_rh caudalantteriorcingulate  | ctx_rh_transversetemporal | 0.1228  | ctx_lh_lateraloccipital     | ctx_lh_postcentral        | 0.1388  |
| ctx_lh_pericalcarine             | ctx_rh_precuneus          | 0.1209  | Right_Pallidum              | ctx_lh_pericalcarine      | 0.1382  |
| ctx_rh_lingual                   | ctx_rh_superiorparietal   | 0.1207  | Left_Caudate                | ctx_lh_lingual            | 0.1366  |
| Left_Hippocampus                 | Left_Accumbens_area       | 0.1206  | Right_Caudate               | ctx_lh_pericalcarine      | 0.1357  |

**Table S2.** Edge rank emotion vs. gambling

| Emotion vs. Gambling |                                 |         |
|----------------------|---------------------------------|---------|
| Edges                |                                 | Entropy |
| Brain_Stem           | ctx_lh_pericalcarine            | 0.7195  |
| ctx_lh_cuneus        | ctx_lh_pericalcarine            | 0.6580  |
| Left_Hippocampus     | Right_Pallidum                  | 0.5991  |
| Brain_Stem           | ctx_lh_cuneus                   | 0.5920  |
| Left_Hippocampus     | ctx_rh caudalantteriorcingulate | 0.5830  |
| Left_Pallidum        | Right_Pallidum                  | 0.5671  |
| Left_Caudate         | Left_Hippocampus                | 0.5614  |
| ctx_lh_pericalcarine | ctx_rh_pericalcarine            | 0.5489  |
| Left_Hippocampus     | ctx_lh_precuneus                | 0.5439  |
| Brain_Stem           | ctx_rh_lingual                  | 0.5422  |
| Left_Putamen         | Brain_Stem                      | 0.5317  |
| Brain_Stem           | ctx_rh_pericalcarine            | 0.5283  |
| ctx_lh_cuneus        | ctx_rh_pericalcarine            | 0.5147  |
| ctx_lh_pericalcarine | ctx_lh_superiorfrontal          | 0.5099  |
| ctx_lh_cuneus        | ctx_lh_lateraloccipital         | 0.5054  |
| Left_Hippocampus     | Right_Accumbens_area            | 0.5026  |
| Right_Hippocampus    | ctx_rh_transversetemporal       | 0.4910  |
| Right_Pallidum       | ctx_rh parahippocampal          | 0.4900  |
| Left_Putamen         | ctx_rh_pericalcarine            | 0.4800  |
| Left_Hippocampus     | ctx_lh_transversetemporal       | 0.4758  |
| ctx_lh_cuneus        | ctx_lh_lingual                  | 0.4605  |
| Left_Hippocampus     | ctx_rh_lateraloccipital         | 0.4599  |
| Left_Hippocampus     | Right_Caudate                   | 0.4597  |
| ctx_lh_cuneus        | ctx_lh_postcentral              | 0.4578  |
| ctx_lh_precuneus     | ctx_lh_transversetemporal       | 0.4561  |

**Table S3.** Significant regions extracted by other centrality measures between emotion *vs.* no-task.

| Degree               | Betweenness    | Eigenvector          | Leverage     |
|----------------------|----------------|----------------------|--------------|
| PericalcarineL       | PericalcarineL | AmygdalaR            | AmygdalaR    |
| SuperiorparietalL    | PostcentralL   | ParsopercularisL     | PrecuneusL   |
| FusiformR            | PrecentralL    | ParstriangularisL    | FusiformR    |
| PericalcarineR       | PrecuneusL     | PericalcarineL       | HippocampusL |
| SuperiorparietalR    | CuneusR        | RostralMidFontalL    |              |
| RostralAntCingulateR | PericalcarineR | EntorhinalR          |              |
|                      | PrecuneusR     | FusiformR            |              |
|                      |                | RostralAntCingulateR |              |
|                      |                | RostralMidFrontalR   |              |

**Table S4.** Significant regions extracted by other centrality measures between gambling *vs.* no-task.

| Degree           | Betweenness       | Eigenvector       | Leverage         |
|------------------|-------------------|-------------------|------------------|
| PallidumL        | HippocampusL      | BrainStem         | AmygdalaR        |
| AccumbL          | CerebCortR        | AccumbL           | ParsopercularisL |
| CaudateR         | CaudMidFrontalL   | CaudateR          | AccumbL          |
| AmygdalaR        | InfTempCortL      | LingualL          | ParsorbitalisR   |
| AccumbensR       | LatOrbitofrontalL | ParacentralL      | HippocampusL     |
| MidTemporalL     | MedOrbitofrontalL | ParstriangularisL |                  |
| ParsopercularisL |                   | InsulaL           |                  |
| PostcentralL     |                   | FusiformR         |                  |
| PrecentralR      |                   | InfTempCortR      |                  |
| SuperiorfrontalR |                   | ParsorbitalisR    |                  |

### S.5. Histogram

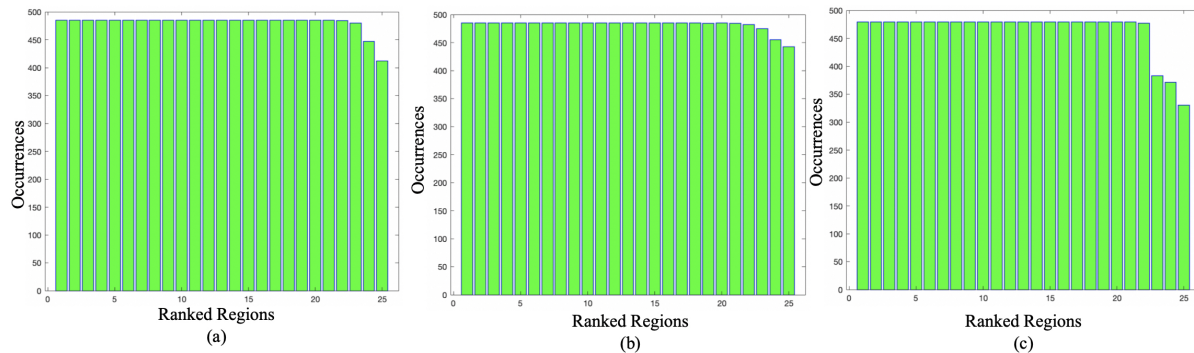

**Figure S10.** Histograms of occurrence for top-25 regions during leave-one-out ranking procedure. Algorithm 3 was run 475 times, each time leaving one subject out. Occurrence of top-25 regions among top-25 regions are plotted. The number represents ranked regions in Table 2. (a) Emotion *vs.* no-task, (b) gambling *vs.* no-task, (c) emotion *vs.* gambling.



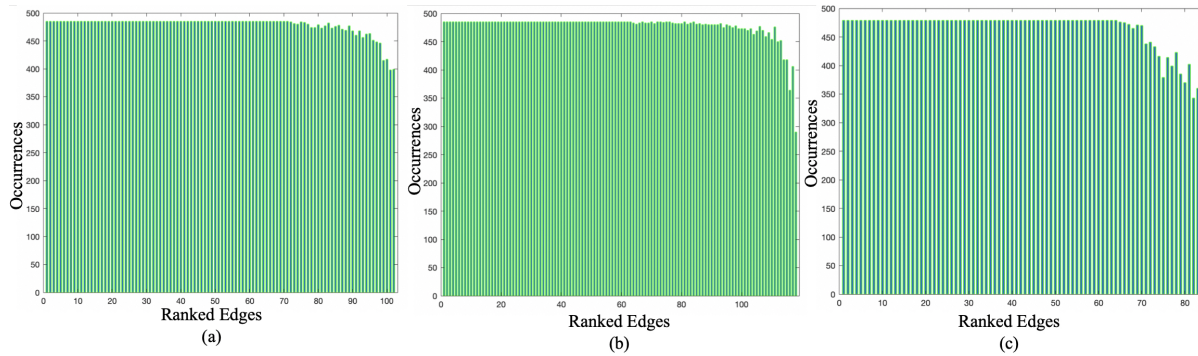

**Figure S11.** Histograms of occurrence for significant edges during leave-one-out ranking procedure. Algorithm 3 was run 475 times, each time leaving one subject out. Occurrence of significant edges are plotted. Edge numbers represent ranked edges in Table S1 and Table S2 in this Supplementary Information. (a) Emotion vs. no-task, (b) gambling vs. no-task, (c) emotion vs. gambling.

### S.6. Distribution of Accuracy Values

This subsection contains the histograms for performing permutation test on the three classification tasks.

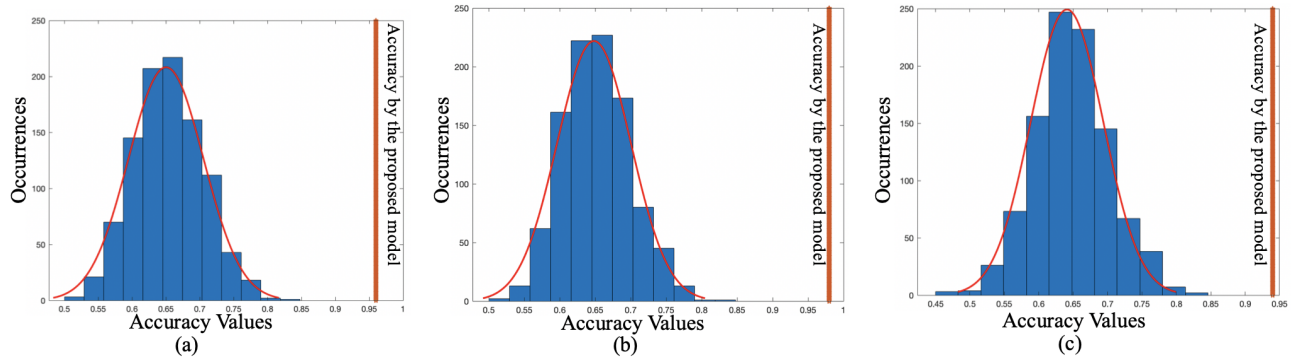

**Figure S12.** Permutation tests by randomly assigning labels. Results from 1000 iterations are shown in histogram. Results from proposed model are shown in red bar. (a) Emotion vs. no-task, (b) gambling vs. no-task, (c) emotion vs. gambling.

### S.7. Structural Centrality and Graph Entropy

Graph entropy is related to *structural centrality* of a graph. In order to investigate the relationship between the two metrics, we simulate 100,000 random graphs consisting of 85 nodes. The edge values are created based on a uniform distribution between 0-1. For each graph, we calculate both *structural centrality* and graph entropy; these are plotted in Fig. S13. We also overlay the ranges for graph entropy for real brain graphs. These two quantities have an inverse relationship. As structural centrality of a graph increases, its entropy reduces. The opposite is true when entropy increases. A graph is more central and consists of one leader when entropy is less. On the other hand, the impact of nodes is more uniform when entropy of graph increases. Real fMRI datasets from Human Connectome Project consist of entropy values in the middle range.

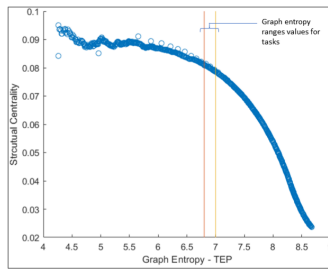

**Figure S13.** Structural centrality vs. graph entropy. Here 100 thousands random graphs consisting of 85 nodes were created of varying centrality. Each node graph entropy and structural centrality were calculated and plotted. The boundary for highest and lowest value for entropies of human brain network is shown in yellow lines.

### S.8. Comparison of Graph Entropy and Sub-graph Entropy between Two Groups

This subsection contains images containing comparison of graph entropy and sub-graph (intersection and union of top regions and edges) entropies between two groups.

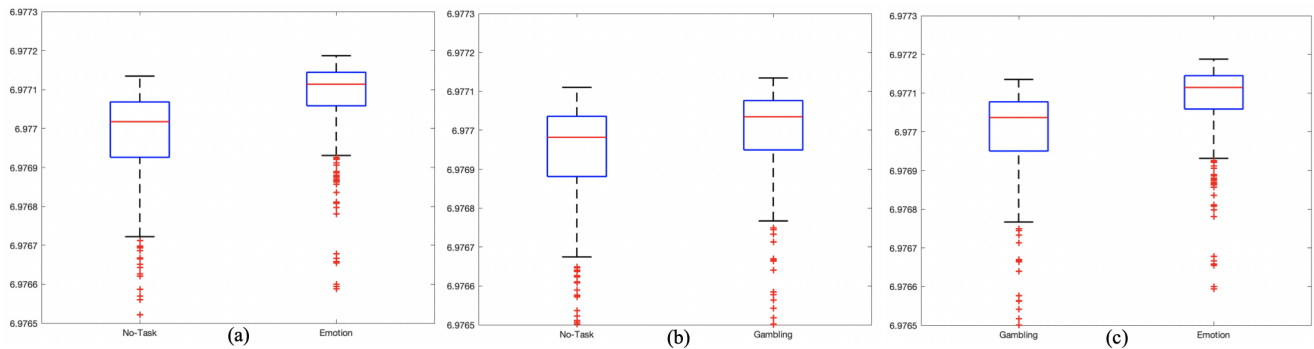

**Figure S14.** Comparison of group-level mean values for graph entropy for whole graph between two *states*. a) Emotion vs. no-task, b) gambling vs. no-task, c) emotion vs. gambling. The graph entropies are calculated for each subject and *state*.

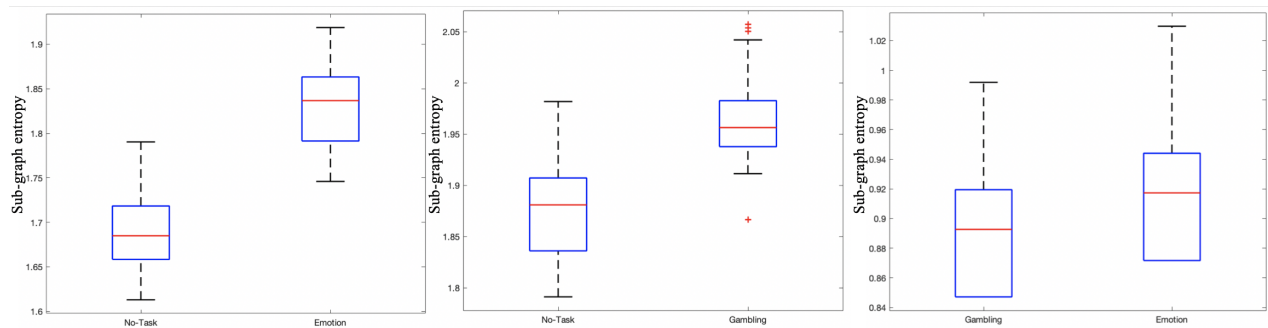

**Figure S15.** *Sub-graph - I*: Comparison of group-level mean values for *sub-graph* entropy for sub-network containing the *intersection* of top-25 regions and significant edges between two *states*. a) Emotion vs. no-task (54 edges), b) gambling vs. no-task (64 edges), c) emotion vs. gambling (17 edges). The graph entropies are calculated for each subject and *state*.

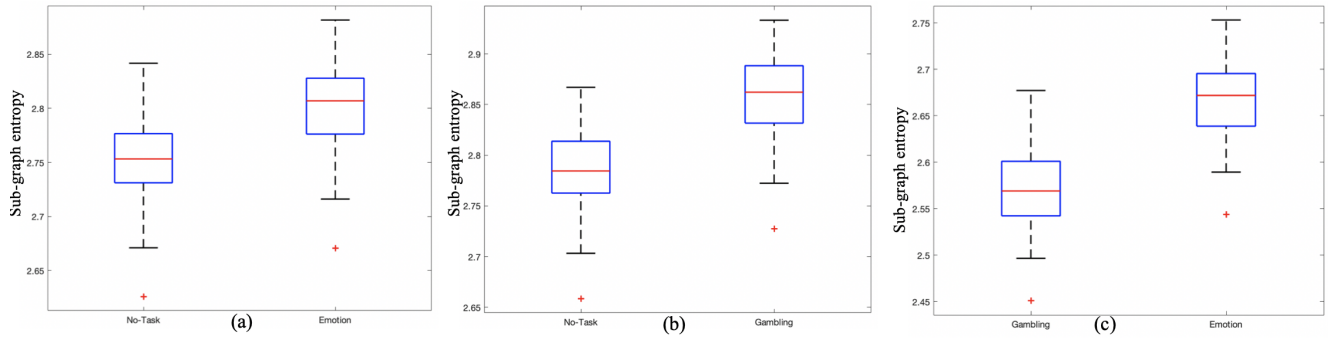

**Figure S16.** *Sub-graph - 2:* Comparison of group-level mean values for *sub-graph* entropy for sub-network containing *union* of top-25 regions and significant edges between two *states*. a) Emotion vs. no-task (102 edges), b) gambling vs. no-task (118 edges), c) emotion vs. gambling (83 edges). The graph entropies are calculated for each subject and *state*.

### S.9: Atlas Details

This section provides the details of Freesurfer atlas regions and their corresponding coordinates in MNI152 space.

**Table S5.** Freesurfer Atlas Coordinates and Regions

| X            | Y            | Z            | Region                          | X            | Y            | Z            | Region                          |
|--------------|--------------|--------------|---------------------------------|--------------|--------------|--------------|---------------------------------|
| -22.43799052 | -40.01410235 | -49.10043329 | Left_Cerebellum_Cortex          | -27.43047381 | 65.73664656  | -9.245512066 | ctx_lh_rostralmiddlefrontal     |
| -9.365745637 | 2.239886304  | -14.37367795 | Left_Thalamus_Proper            | -8.409821118 | 46.32435307  | 13.8764545   | ctx_lh_superiorfrontal          |
| -10.07260101 | 27.72348485  | -12.26073232 | Left_Caudate                    | -21.121497   | -41.68930512 | 23.69906348  | ctx_lh_superioparietal          |
| -21.98422754 | 20.16952115  | -20.84432891 | Left_Putamen                    | -46.72014687 | 8.292424968  | -21.74289591 | ctx_lh_superiortemporal         |
| -16.83028771 | 16.79043546  | -23.15999222 | Left_Pallidum                   | -46.00677227 | -13.25964187 | 10.55130854  | ctx_lh_supramarginal            |
| -0.075123916 | -9.236922464 | -48.42339352 | Brain_Stem                      | -5.798690205 | 78.87528474  | -29.70529613 | ctx_lh_frontalpole              |
| -20.50547599 | -2.062973884 | -30.15532856 | Left_Hippocampus                | -25.94376504 | 31.79330393  | -52.99268244 | ctx_lh_temporalpole             |
| -19.81226823 | 15.48516687  | -36.92135352 | Left_Amygdala                   | -36.91558442 | -0.342938312 | -11.6599026  | ctx_lh_transversetemporal       |
| -7.276182432 | 31.04307432  | -27.10304054 | Left_Accumbens.area             | -30.75487945 | 20.2217279   | -20.08969575 | ctx_lh_insula                   |
| 21.48534428  | -39.86756307 | -49.02782405 | Right_Cerebellum_Cortex         | 48.03367217  | -19.09704574 | -10.55749682 | ctx_rh_bankssts                 |
| 9.483949985  | 2.061275227  | -13.59662913 | Right_Thalamus_Proper           | 5.245158888  | 35.7336147   | 3.08031281   | ctx_rh_caudalanteriorcingulate  |
| 11.78609914  | 26.20757004  | -11.62715517 | Right_Caudate                   | 31.32239106  | 30.37378154  | 20.14012328  | ctx_rh_caudalmiddlefrontal      |
| 22.79048673  | 20.47876106  | -20.71349558 | Right_Putamen                   | 5.413062284  | -61.50735294 | 2.649221453  | ctx_rh_cuneus                   |
| 17.75835396  | 15.67295792  | -21.86726485 | Right_Pallidum                  | 19.14095007  | 13.88072122  | -47.39684466 | ctx_rh_entorhinal               |
| 22.00855593  | -1.230696995 | -31.1206177  | Right_Hippocampus               | 30.54333274  | -25.02878436 | -34.88151553 | ctx_rh_fusiform                 |
| 20.08349546  | 15.711738    | -37.17331388 | Right_Amygdala                  | 40.10512232  | -41.90762888 | 9.178134557  | ctx_rh_inferioparietal          |
| 6.856174699  | 29.9811747   | -26.78840361 | Right_Accumbens.area            | 43.5415707   | -8.394461078 | -39.20629894 | ctx_rh_inferiortemporal         |
| -46.56135363 | -24.43048423 | -8.671588408 | ctx_lh_bankssts                 | 5.855446927  | -27.09696728 | -1.528830806 | ctx_rh_isthmuscingulate         |
| -2.641475645 | 34.52602674  | 4.327244508  | ctx_lh_caudalanteriorcingulate  | 28.27539489  | -65.8775836  | -18.00317174 | ctx_rh_lateraloccipital         |
| -29.18799213 | 34.20815342  | 18.68062611  | ctx_lh_caudalmiddlefrontal      | 21.03270609  | 48.73015873  | -34.47388633 | ctx_rh_lateralorbitofrontal     |
| -8.394193234 | -59.99674691 | 0.810426155  | ctx_lh_cuneus                   | 9.887762593  | -49.87773888 | -19.71100632 | ctx_rh_lingual                  |
| -21.87644009 | 14.07402074  | -47.78801843 | ctx_lh_entorhinal               | 4.966974573  | 55.82042114  | -33.24071315 | ctx_rh_medialorbitofrontal      |
| -30.9386489  | -27.44044884 | -34.66050092 | ctx_lh_fusiform                 | 50.85591502  | -4.637917276 | -30.79573414 | ctx_rh_middletemporal           |
| -38.44759259 | -46.19018519 | 10.055       | ctx_lh_inferioparietal          | 21.59495927  | -9.769602851 | -33.93711813 | ctx_rh parahippocampal          |
| -45.16522307 | -13.35528397 | -36.35213969 | ctx_lh_inferiortemporal         | 5.574623858  | -6.455534659 | 29.1560317   | ctx_rh_paracentral              |
| -6.797138047 | -26.52777778 | -0.606060606 | ctx_lh_isthmuscingulate         | 43.43193444  | 33.05039788  | -5.577159909 | ctx_rh_parsopercularis          |
| -28.81817994 | -68.91491475 | -14.09027893 | ctx_lh_lateraloccipital         | 39.84943842  | 55.80170411  | -30.06438807 | ctx_rh_parsorbitalis            |
| -21.51043029 | 49.65374052  | -35.04103453 | ctx_lh_lateralorbitofrontal     | 44.60538203  | 44.68959732  | -16.17094734 | ctx_rh_parietotemporal          |
| -12.85870064 | -50.95184803 | -21.89164371 | ctx_lh_lingual                  | 10.07145966  | -62.11767266 | -9.486723738 | ctx_rh_pericalcarine            |
| -5.424302789 | 52.46314741  | -33.96962151 | ctx_lh_medialorbitofrontal      | 37.2218269   | -2.29390681  | 18.21908602  | ctx_rh_postcentral              |
| -51.38255075 | -1.05607361  | -29.19242037 | ctx_lh_middletemporal           | 4.539522514  | 1.299480455  | 13.94575705  | ctx_rh_posteriorcingulate       |
| -20.70094021 | -10.09763742 | -33.50470106 | ctx_lh parahippocampal          | 35.74047669  | 11.18046754  | 17.23375229  | ctx_rh_precentral               |
| -6.551643921 | -8.080024814 | 28.71665633  | ctx_lh_paracentral              | 7.952909887  | -39.13619703 | 12.41339621  | ctx_rh_precuneus                |
| -39.82481355 | 38.1677284   | -3.969468614 | ctx_lh_parsopercularis          | 5.23004886   | 53.77137622  | -18.7896987  | ctx_rh_rostralanteriorcingulate |
| -37.70623742 | 60.72183099  | -31.45120724 | ctx_lh_parsorbitalis            | 29.98936817  | 63.1596294   | -6.599787363 | ctx_rh_rostralmiddlefrontal     |
| -41.22619629 | 47.33825684  | -19.5916748  | ctx_lh_parietotemporal          | 10.21130626  | 44.56652488  | 15.72779455  | ctx_rh_superiorfrontal          |
| -11.2699553  | -63.45146871 | -10.27378672 | ctx_lh_pericalcarine            | 19.52022891  | -44.67677003 | 23.1629292   | ctx_rh_superioparietal          |
| -37.7076791  | -0.500245339 | 17.57396958  | ctx_lh_postcentral              | 47.22200315  | 10.34015441  | -23.27712519 | ctx_rh_superiortemporal         |
| -4.185311284 | -0.283722438 | 12.20330739  | ctx_lh_posteriorcingulate       | 46.5050845   | -10.93363136 | 9.673192179  | ctx_rh_supramarginal            |
| -35.30378452 | 13.60621618  | 15.33101499  | ctx_lh_precentral               | 7.123893805  | 80.40376106  | -25.63053097 | ctx_rh_frontalpole              |
| -8.750484872 | -38.07336113 | 13.38877036  | ctx_lh_precuneus                | 22.85859073  | 30.3030888   | -51.48117761 | ctx_rh_temporalpole             |
| -3.369775542 | 54.56656347  | -17.64705882 | ctx_lh_rostralanteriorcingulate | 38.81806931  | 1.170792079  | -13.0730198  | ctx_rh_transversetemporal       |
| -27.43047381 | 65.73664656  | -9.245512066 | ctx_lh_rostralmiddlefrontal     | 32.27828362  | 19.71071121  | -21.13080728 | ctx_rh_insula                   |

## S.10: Sample Average Entropy as Group Entropy

### Theorem 1

Let  $H_{opt}$  be the group graph entropy for a unique state (task or no-task). Let  $H_k$  be the graph entropy for for  $k^{th}$  subject. We show that the sequence  $\frac{1}{n} \sum_{k=1}^n H_k \rightarrow H_{opt}$  in probability. In other words, for any arbitrary small  $\varepsilon > 0$

$$\lim_{n \rightarrow \infty} P(|H_{opt} - \frac{1}{n} \sum_{k=1}^n H_k| > \varepsilon) = 0 \quad (1)$$

*Proof.* Let  $\Sigma_{opt}$  be the corresponding adjacency matrix for  $H_{opt}$ . Here, the edge between regions  $(i, j)$  is given by  $e_{i,j} = \sigma_{i,j} = \Sigma_{opt}(i, j)$ . Let  $G = (V, E)$ , thus

$$q_{i,j} = \begin{cases} \frac{e_{ij}}{\sum_{(e_{ij} \in E)}} & \text{when } i \neq j \\ 0 & \text{when } i = j \end{cases}$$

$$H_{opt} = \sum_{i,j} q_{i,j} \log_2(q_{i,j})$$

For  $k^{th}$  subject,

$$H_k = \sum_{i,j} q_{i,j}^k \log_2(q_{i,j}^k)$$

It is clear that

$$\begin{aligned} |H_{opt} - \frac{1}{n} \sum_{k=1}^n H_k| &= \left| \sum_{i,j} q_{i,j} \log_2(q_{i,j}) - \frac{1}{n} \sum_{k=1}^n \sum_{i,j} q_{i,j}^k \log_2(q_{i,j}^k) \right| \\ &= \left| \sum_{i,j} (q_{i,j} \log_2(q_{i,j}) - \frac{1}{n} \sum_{k=1}^n q_{i,j}^k \log_2(q_{i,j}^k)) \right| \\ &\leq \sum_{i,j} |(q_{i,j} \log_2(q_{i,j}) - \frac{1}{n} \sum_{k=1}^n q_{i,j}^k \log_2(q_{i,j}^k))| \text{ according to cauchy schwarz inequality} \end{aligned} \quad (2)$$

From, Eqn. 2 and 1,

$$\lim_{n \rightarrow \infty} P(\sum_{i,j} |(q_{i,j} \log_2(q_{i,j}) - \frac{1}{n} \sum_{k=1}^n q_{i,j}^k \log_2(q_{i,j}^k))| > \varepsilon) = 0 \rightarrow \lim_{n \rightarrow \infty} P(|H_{opt} - \frac{1}{n} \sum_{k=1}^n H_k| > \varepsilon) = 0 \quad (3)$$

Let's see the result for  $(i, j)$ . Using log-sum inequality,

$$\begin{aligned} \frac{1}{n} \sum_{k=1}^n q_{i,j}^k \log_2(q_{i,j}^k) &\geq \frac{1}{n} \sum_{k=1}^n q_{i,j}^k \log_2 \frac{(\sum_{k=1}^n q_{i,j}^k)}{n} \\ \text{or, } -\frac{1}{n} \sum_{k=1}^n q_{i,j}^k \log_2(q_{i,j}^k) &\leq -\frac{1}{n} \sum_{k=1}^n q_{i,j}^k \log_2 \frac{(\sum_{k=1}^n q_{i,j}^k)}{n} \\ \text{or, } |q_{i,j} \log_2(q_{i,j}) - \frac{1}{n} \sum_{k=1}^n q_{i,j}^k \log_2(q_{i,j}^k)| &< |q_{i,j} \log_2(q_{i,j}) - \frac{1}{n} \sum_{k=1}^n q_{i,j}^k \log_2 \frac{(\sum_{k=1}^n q_{i,j}^k)}{n}| \end{aligned} \quad (4)$$

For simplicity let's define  $z = q_{i,j}$  and  $z_n = \frac{1}{n} \sum_{k=1}^n q_{i,j}^k$ . Also, let  $G : (0, 1] \rightarrow R$  such that  $G(z) = z \log_2(z)$ . Clearly  $G$  is a continuous function in the range of  $z$ .

Using law of law of large numbers  $z_n \rightarrow z$  in probability. Now continuous mapping theorem implies  $G(z_n) \rightarrow G(z)$  in probability.

Let  $z^k = q_{i,j}^k$ , we need to prove that  $\frac{1}{n} \sum_{k=1}^n G(z_k) \rightarrow G(z)$  in probability.  
 As  $G(z_n) \rightarrow G(z)$  in probability,

$$\lim_{n \rightarrow \infty} P(|G(z) - G(z_n)| > \varepsilon) = 0 \quad (5)$$

From Eqn. 4,

$$|G(z) - G(z_n)| > |G(z) - \frac{1}{n} \sum_{k=1}^n G(z_k)|$$

Eqn. 5 implies as  $n \rightarrow \infty$ ,

$$|G(z) - G(z_n)| < \varepsilon$$

or,  $|G(z) - \frac{1}{n} \sum_{k=1}^n G(z_k)| < |G(z) - G(z_n)| < \varepsilon$

Hence,

$$\lim_{n \rightarrow \infty} P(|G(z) - \frac{1}{n} \sum_{k=1}^n G(z_k)| > \varepsilon) = 0 \quad (6)$$

Hence we prove that,

$$\lim_{n \rightarrow \infty} P(\sum_{i,j} |(q_{i,j} \log_2(q_{i,j}) - \frac{1}{n} \sum_{k=1}^n q_{i,j}^k \log_2(q_{i,j}^k))| > K\varepsilon) = 0 \text{ where } K \text{ is number of edges (constant)}$$

Using the same inequality, it follows that,

$$\lim_{n \rightarrow \infty} P(|H_{opt} - \frac{1}{n} \sum_{k=1}^n H_k| > \varepsilon) = 0$$

where  $K\varepsilon$  is replaced as  $\varepsilon$ . □

As a corollary, mean value of subject *sub-graph* entropies ( $H_k^r$ ) also approaches group *sub-graph* ( $H_{opt}^r$ ) entropy in probability, *i.e.*, for region  $r$ .

$$\lim_{n \rightarrow \infty} P(|H_{opt}^r - \frac{1}{n} \sum_{k=1}^n H_k^r| > \varepsilon) = 0$$

### S.11: Maximizing *Sub-Graph* Entropy is Equivalent to Maximizing Mutual Information

*Proof.* Notice that once we know the communication pattern for the whole graph, we also know the communication pattern for the *sub-graphs*. So, given  $G$ , the conditional entropy of *sub-graph*  $G_s$  given by  $H(G_s|G)$  equals 0.

$$\begin{aligned} I(G; G_{v_s}) &= H(G_s) - H(G_s|G) \\ &= H(G_s), \text{ as } H(G_s|G) = 0 \end{aligned}$$

□

### S.12: Correlation Coefficient as Edge Weight

Let  $x$  denote the fMRI time series from  $R$  regions of a subject for a state (task or no-task). It has size  $R \times 1$  where  $R$  is regions. Also, let  $x_r$  be the time series from  $r^{th}$  region.

**Theorem 2**

Let the edge weight  $e_{i,j} \sim \text{Ber}(\theta_{i,j})$  where  $\text{Ber}(\theta)$  is Bernoulli distribution with parameter  $\theta$ . Here  $\theta_{i,j}$  captures the relationship between regions  $(i, j)$ . Assume that,  $\mathbf{x} \sim N(0, \Sigma)$  where  $\Sigma$  is covariance matrix with  $\Sigma(i, j) = \sigma_{i,j}$ , i.e.,  $\sigma_{i,j}$  is  $(i, j)^{\text{th}}$  entry of  $\Sigma$ . Then the minimum mean square error (MMSE) estimate of  $e_{i,j}$  is given by  $\hat{e}_{i,j} = \sigma_{i,j}$ .

*Proof.* The  $(i, j)^{\text{th}}$  entry of  $\Sigma$  is given by  $\sigma_{i,j} = E[x_i x_j]$ . As  $x$  is Gaussian, the covariance captures all the information between the relation of two regions  $(i, j)$ . Hence,  $\theta_{i,j} = \sigma_{i,j}$ .

To calculate the MMSE estimate, we note that  $P(e_{i,j}) = \begin{cases} \theta_{i,j} & \text{if } e_{i,j} = 1 \\ 1 - \theta_{i,j} & \text{if } e_{i,j} = 0 \end{cases}$

In order to calculate the estimation, we minimize  $E[(\hat{e}_{i,j} - e_{i,j})^2]$ .

$$\begin{aligned} E[(\hat{e}_{i,j} - e_{i,j})^2] &= (1 - \hat{e}_{i,j})^2 \theta + (0 - \hat{e}_{i,j})^2 (1 - \theta) = (1 - 2\hat{e}_{i,j})\theta + \hat{e}_{i,j}^2 \\ &= (\hat{e}_{i,j} - \theta)^2 + \theta(1 - \theta) \geq (\hat{e}_{i,j} - \theta)^2 \text{ as } \theta \in [0, 1]. \end{aligned}$$

Also,  $E[(\hat{e}_{i,j} - e_{i,j})^2] \geq 0$ . So, the value for which MMSE is minimum is achievable by  $\hat{e}_{i,j}$  equal to  $\theta_{i,j}$ . Thus,  $\hat{e}_{i,j} = \theta_{i,j} = \sigma_{i,j}$ .  $\square$
